# Supplementary material
Source: publisher site journal article supplement (http://www.degruyter.com/publication/journal_key/KL/downloadAsset/KL_NEW_Review_Essays.pdf)
Supplement: Supplementary file 1 [file KL_NEW_Review_Essays.pdf]

## Editors' Note

### Special Issue: Cities in Distress

DOI 10.1515/kl-2014-00061

In the English language section of *Kritikon*, we are now offering review-essays that can report on significant new releases in a larger field of academic interest. We envision work that discovers new titles, suggests directions for future work, and may rescue valuable older work from neglect.

This issue features a special focus section on “cities in distress.” Berndt Ostendorf evaluates studies of post-Katrina New Orleans, among others. Thoren Opitz investigates a new analysis of the urban landscape in television’s *The Wire*, and Timothy Sutton a new book on Joyce’s Dublin and *Dubliners*. In the arts, Nassim W. Balestrini considers new criticism in the fields of opera and adaptation studies; Barbara Ravelhofer turns an appreciative eye to the painted body and Renaissance English theatricality. Marcel Hartwig introduces studies on rewriting early America in the medico-historical way. In his review essay “Celtic Tigers,” Craig R. Davis brings into focus recent studies in Early Irish and Welsh literature. The issue closes with M. Wendy Hennequin’s report on a new study of the history and legend of the Holy Grail.

The editors are glad to consider proposals for new essay-reviews.

The Editors for American and English Studies,  
Kirby Farrell (email: [kfarrell@english.umass.edu](mailto:kfarrell@english.umass.edu)) and  
Kerstin Schmidt (email: [Kerstin.Schmidt@ku.de](mailto:Kerstin.Schmidt@ku.de))
